# Supplementary material
Source: PubMed Central journal article supplement (PMC6298575)
Supplement: NIHMS80326-supplement-Supplementary_Material.pdf [file NIHMS80326-supplement-Supplementary_Material.pdf]

**Supplementary Material****Oesophageal Cancer Clinical and Molecular Stratification (OCCAMS) Consortium:**

Ayesha Noorani<sup>1</sup>, Paul A.W. Edwards<sup>1,2</sup>, Nicola Grehan<sup>1</sup>, Barbara Nutzinger<sup>1</sup>, Caitriona Hughes<sup>1</sup>, Elwira Fidziukiewicz<sup>1</sup>, Jan Bornschein<sup>1</sup>, Shona MacRae<sup>1</sup>, Jason Crawte<sup>1</sup>, Gianmarco Contino<sup>1</sup>, Xiaodun Li<sup>1</sup>, Rachel de la Rue<sup>1</sup>, Maria O'Donovan<sup>1,3</sup>, Ahmad Miremadi<sup>1,3</sup>, Shalini Malhotra<sup>1,3</sup>, Monika Tripathi<sup>1,3</sup>, Simon Tavaré<sup>2</sup>, Andy G. Lynch<sup>2</sup>, Matthew Eldridge<sup>2</sup>, Maria Secrier<sup>2</sup>, Lawrence Bower<sup>2</sup>, Ginny Devonshire<sup>2</sup>, Juliane Perner<sup>2</sup>, Sriganesh Jammula<sup>2</sup>, Jim Davies<sup>5</sup>, Charles Crichton<sup>5</sup>, Nick Carroll<sup>6</sup>, Peter Safranek<sup>6</sup>, Andrew Hindmarsh<sup>6</sup>, Vijayendran Sujendran<sup>6</sup>, Stephen J. Hayes<sup>7,14</sup>, Yeng Ang<sup>7,8,29</sup>, Shaun R. Preston<sup>9</sup>, Sarah Oakes<sup>9</sup>, Izhar Bagwan<sup>9</sup>, Vicki Save<sup>10</sup>, Richard J.E. Skipworth<sup>10</sup>, Ted R. Hupp<sup>10</sup>, J. Robert O'Neill<sup>10,23</sup>, Olga Tucker<sup>11,33</sup>, Andrew Beggs<sup>11,28</sup>, Philippe Taniere<sup>11</sup>, Sonia Puig<sup>11</sup>, Timothy J. Underwood<sup>12,13</sup>, Fergus Noble<sup>12</sup>, Jack Owsley<sup>12</sup>, Hugh Barr<sup>15</sup>, Neil Shepherd<sup>15</sup>, Oliver Old<sup>15</sup>, Jesper Lagergren<sup>16,25</sup>, James Gossage<sup>16,24</sup>, Andrew Davies<sup>16,24</sup>, Fujun Chang<sup>16,24</sup>, Janine Zylstra<sup>16,24</sup>, Ula Mahadeva<sup>16</sup>, Vicky Goh<sup>24</sup>, Francesca D. Ciccarelli<sup>24</sup>, Grant Sanders<sup>17</sup>, Richard Berrisford<sup>17</sup>, Catherine Harden<sup>17</sup>, David Bunting<sup>17</sup>, Mike Lewis<sup>18</sup>, Ed Cheong<sup>18</sup>, Bhaskar Kumar<sup>18</sup>, Simon L Parsons<sup>19</sup>, Irshad Soomro<sup>19</sup>, Philip Kaye<sup>19</sup>, John Saunders<sup>19</sup>, Laurence Lovat<sup>20</sup>, Rehan Haidry<sup>20</sup>, Victor Eneh<sup>20</sup>, Laszlo Igali<sup>21</sup>, Michael Scott<sup>22</sup>, Sharmila Sothi<sup>26</sup>, Sari Suortamo<sup>26</sup>, Suzy Lishman<sup>27</sup>, George B. Hanna<sup>31</sup>, Christopher J. Peters<sup>31</sup>, Anna Grabowska<sup>32</sup>, Richard Turkington<sup>34</sup>.

<sup>1</sup> Medical Research Council Cancer Unit, Hutchison/Medical Research Council Research Centre, University of Cambridge, Cambridge, UK

<sup>2</sup> Cancer Research UK Cambridge Institute, University of Cambridge, Cambridge, UK

<sup>3</sup> Department of Histopathology, Addenbrooke's Hospital, Cambridge, UK

<sup>4</sup> Oxford ComLab, University of Oxford, UK, OX1 2JD

<sup>5</sup> Department of Computer Science, University of Oxford, UK, OX1 3QD

<sup>6</sup> Cambridge University Hospitals NHS Foundation Trust, Cambridge, UK, CB2 0QQ

<sup>7</sup> Salford Royal NHS Foundation Trust, Salford, UK, M6 8HD

<sup>8</sup> Wigan and Leigh NHS Foundation Trust, Wigan, Manchester, UK, WN1 2NN

<sup>9</sup> Royal Surrey County Hospital NHS Foundation Trust, Guildford, UK, GU2 7XX

<sup>10</sup> Edinburgh Royal Infirmary, Edinburgh, UK, EH16 4SA

<sup>11</sup> University Hospitals Birmingham NHS Foundation Trust, Birmingham, UK, B15 2GW

<sup>12</sup> University Hospital Southampton NHS Foundation Trust, Southampton, UK, SO16 6YD

<sup>13</sup> Cancer Sciences Division, University of Southampton, Southampton, UK, SO17 1BJ

- <sup>14</sup>Faculty of Medical and Human Sciences, University of Manchester, UK, M13 9PL
- <sup>15</sup>Gloucester Royal Hospital, Gloucester, UK, GL1 3NN
- <sup>16</sup>Guy's and St Thomas's NHS Foundation Trust, London, UK, SE1 7EH
- <sup>17</sup>Plymouth Hospitals NHS Trust, Plymouth, UK, PL6 8DH
- <sup>18</sup>Norfolk and Norwich University Hospital NHS Foundation Trust, Norwich, UK, NR4 7UY
- <sup>19</sup>Nottingham University Hospitals NHS Trust, Nottingham, UK, NG7 2UH
- <sup>20</sup>University College London, London, UK, WC1E 6BT
- <sup>21</sup>Norfolk and Waveney Cellular Pathology Network, Norwich, UK, NR4 7UY
- <sup>22</sup>Wythenshawe Hospital, Manchester, UK, M23 9LT
- <sup>23</sup>Edinburgh University, Edinburgh, UK, EH8 9YL
- <sup>24</sup>King's College London, London, UK, WC2R 2LS
- <sup>25</sup>Karolinska Institutet, Stockholm, Sweden, SE-171 77
- <sup>26</sup>University Hospitals Coventry and Warwickshire NHS, Trust, Coventry, UK, CV2 2DX
- <sup>27</sup>Peterborough Hospitals NHS Trust, Peterborough City Hospital, Peterborough, UK, PE3 9GZ
- <sup>28</sup>Institute of Cancer and Genomic sciences, University of Birmingham, B15 2TT
- <sup>29</sup>GI science centre, University of Manchester, UK, M13 9PL.
- <sup>30</sup>Queen's Medical Centre, University of Nottingham, Nottingham, UK, NG7 2UH
- <sup>31</sup>Imperial College NHS Trust, Imperial College London, UK, W2 1NY
- <sup>32</sup>Queen's Medical Centre, University of Nottingham, Nottingham, UK
- <sup>33</sup>Heart of England NHS Foundation Trust, Birmingham, UK, B9 5SS.
- <sup>34</sup>Centre for Cancer Research and Cell Biology, Queen's University Belfast, Northern Ireland, UK, BT7 1NN.

### Supplementary Figures

In the OCCAMS cohort we test the following covariates to determine if these drive the survival difference for BE/IM patients: Barrett's surveillance (Suppl. Fig. 1), tumor location (Suppl. Fig. 2), TNM Stage (Suppl. Fig. 3), treatment (Suppl. Fig. 4), and response to neoadjuvant therapy (Suppl. Fig. 5). All models control for age at diagnosis and sex.

None of the subgroups alter the effect of BE/IM on survival.

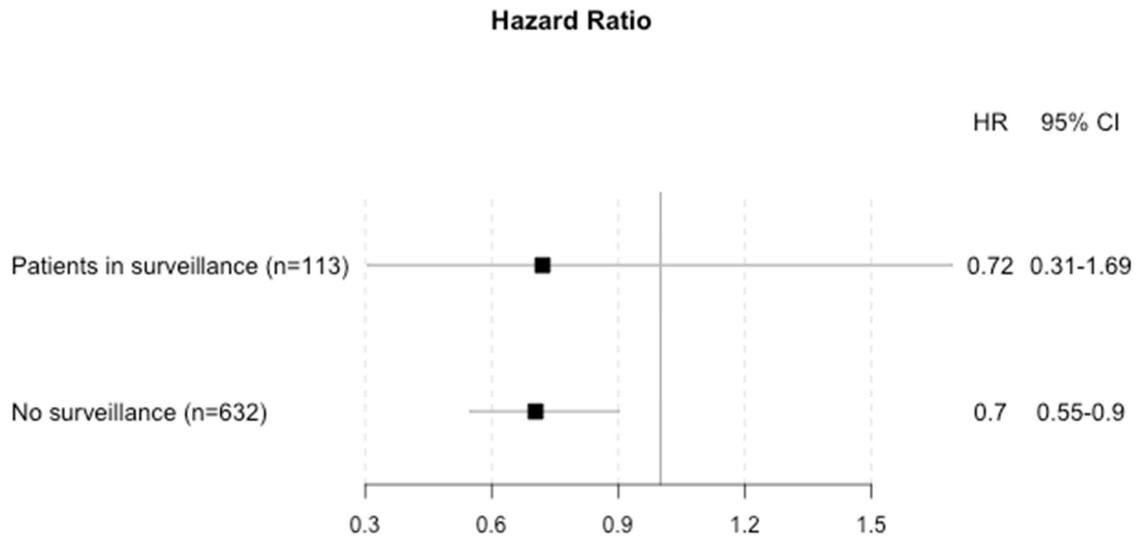

Supplementary Figure 1: Barrett's surveillance in OCCAMS cohort

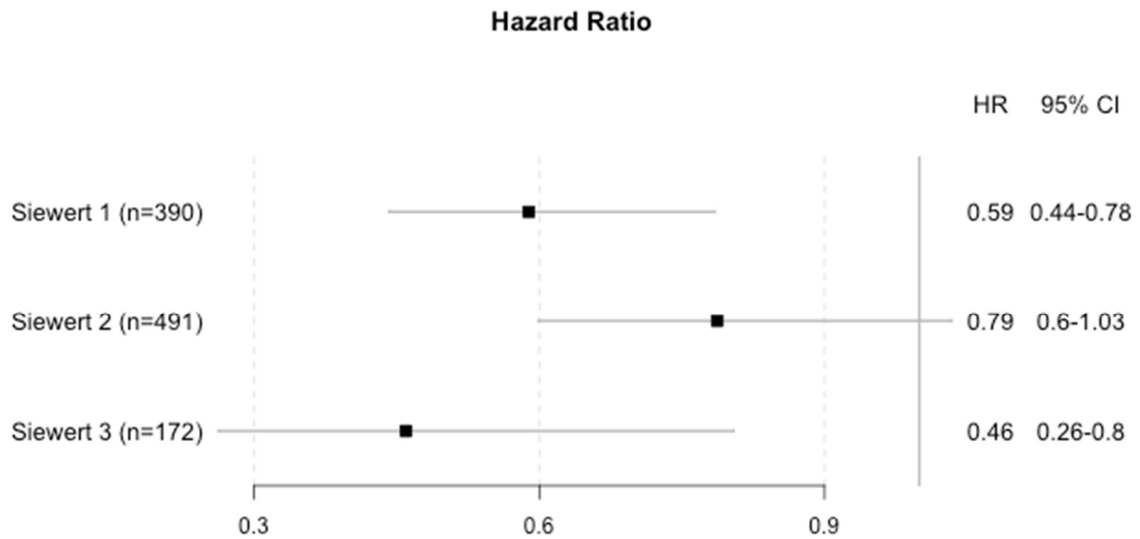

Supplementary Figure 2: Siewert classification.

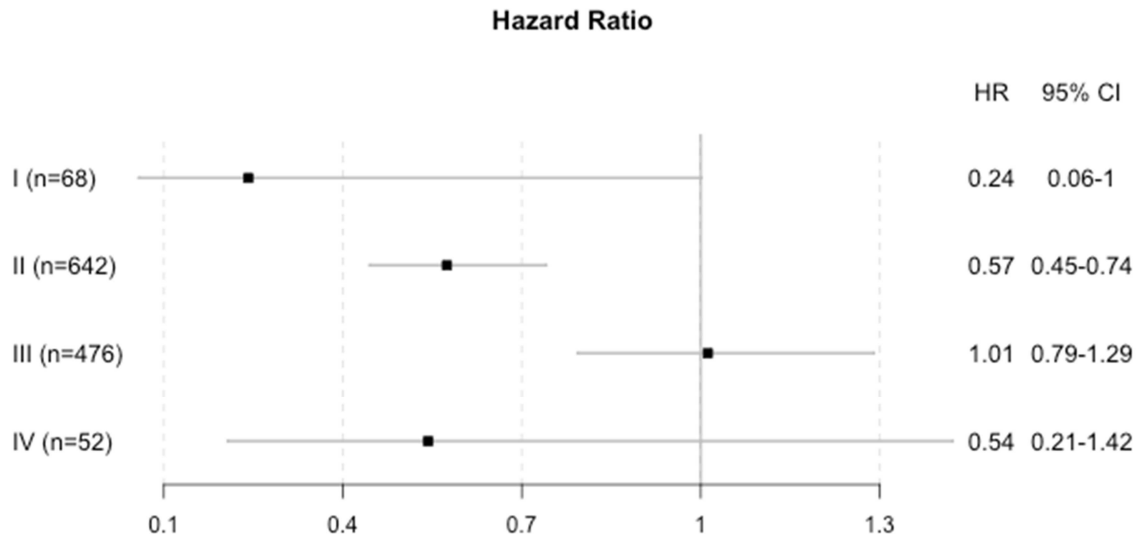

Supplementary Figure 3: TNM stages.

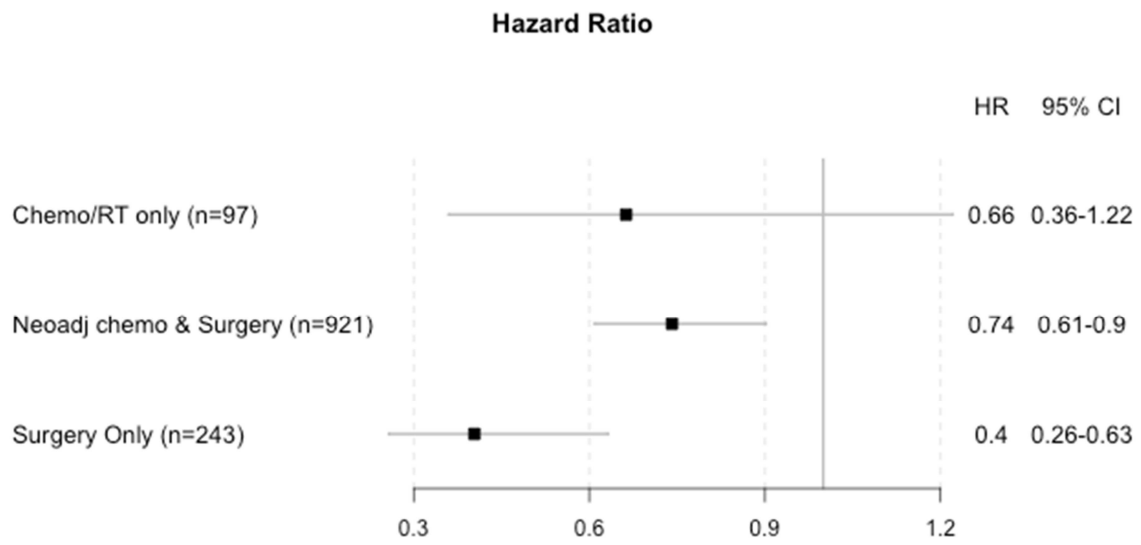

Supplementary Figure 4: Treatment regimens.

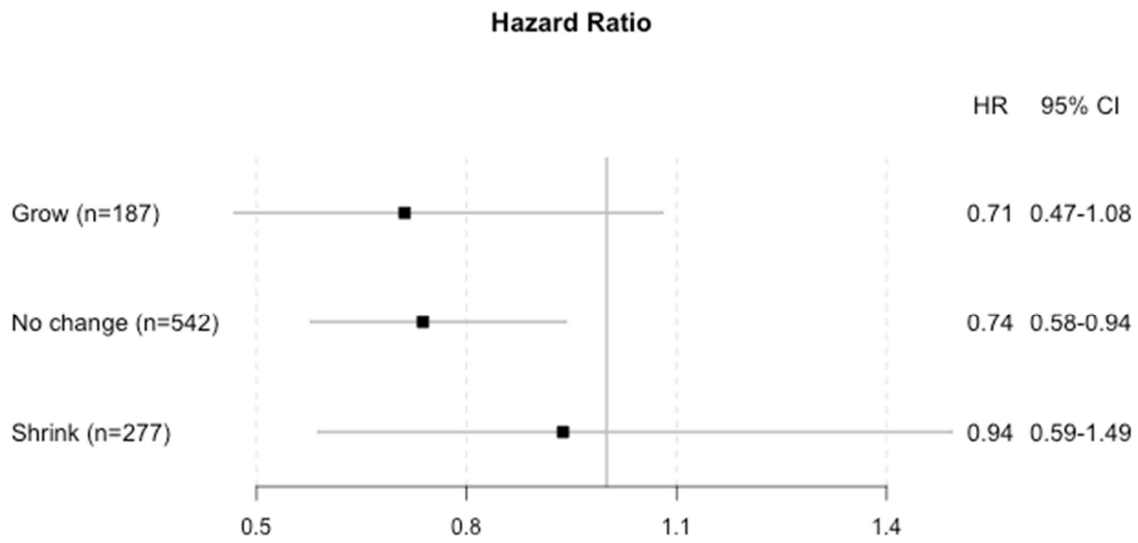

Supplementary Figure 5: Tumor response to neoadjuvant therapy.

**Supplementary Table 1.** Tumor length comparison between BE/IM and non-BE/IM based on stages for the Mayo cohort

| Stage | Length 1-3 cm |                  | 3 cm<Length ≤ 6 cm |                  | Length >6 cm |                  | Missing      |                  | P value |
|-------|---------------|------------------|--------------------|------------------|--------------|------------------|--------------|------------------|---------|
|       | BE/IM, n (%)  | Non-BE/IM, n (%) | BE/IM, n (%)       | Non-BE/IM, n (%) | BE/IM, n (%) | Non-BE/IM, n (%) | BE/IM, n (%) | Non-BE/IM, n (%) |         |
| I     | 53 (85.5)     | 6 (60)           | 4 (6.5)            | 3 (30)           | 0            | 0                | 5 (8)        | 1 (10)           | 0.06    |
| II    | 31 (56.4)     | 17 (46)          | 17 (30.9)          | 12 (32.4)        | 4 (7.3)      | 3 (8.1)          | 3 (5.4)      | 5 (13.5)         | 0.54    |
| III   | 15 (24.6)     | 25 (26.9)        | 26 (42.6)          | 39 (41.9)        | 16 (26.2)    | 22 (23.7)        | 4 (6.6)      | 7 (7.5)          | 0.97    |
| IV    | 8 (30.8)      | 6 (9)            | 10 (38.5)          | 18 (26.9)        | 3 (11.5)     | 21(31.3)         | 5 (19.2)     | 22 (32.8)        | 0.01    |
